# Supplementary material
Source: HighWire-hosted journal article supplement (https://www.cmaj.ca/highwire/filestream/58738/field_highwire_adjunct_files/0/image-hudzik-1-at.pdf)
Supplement: image-hudzik-1-at.pdf [file image-hudzik-1-at.pdf]

**Appendix 1 (as supplied by authors): Various radiographic features of amiodarone-induced pulmonary toxicity**

| <b>Chest X-ray</b>                                |                                                                                                                                                                                                                                                                                                                                                                                                                                                                                                                                                                                                                                                                                                                |                                                                                                                                                                                                                                                                                                                                                                                                              |
|---------------------------------------------------|----------------------------------------------------------------------------------------------------------------------------------------------------------------------------------------------------------------------------------------------------------------------------------------------------------------------------------------------------------------------------------------------------------------------------------------------------------------------------------------------------------------------------------------------------------------------------------------------------------------------------------------------------------------------------------------------------------------|--------------------------------------------------------------------------------------------------------------------------------------------------------------------------------------------------------------------------------------------------------------------------------------------------------------------------------------------------------------------------------------------------------------|
| Lung parenchyma                                   | <ul style="list-style-type: none"> <li>• Patchy/diffuse consolidations</li> </ul>                                                                                                                                                                                                                                                                                                                                                                                                                                                                                                                                                                                                                              | Common, bilateral, ground-glass appearance<br>Nonspecific, may mimic other conditions                                                                                                                                                                                                                                                                                                                        |
| Pleura                                            | <ul style="list-style-type: none"> <li>• Pleural thickening</li> <li>• Pleural effusion</li> </ul>                                                                                                                                                                                                                                                                                                                                                                                                                                                                                                                                                                                                             | Nonspecific, may mimic other conditions                                                                                                                                                                                                                                                                                                                                                                      |
| <b>High-resolution computed tomography (HRCT)</b> |                                                                                                                                                                                                                                                                                                                                                                                                                                                                                                                                                                                                                                                                                                                |                                                                                                                                                                                                                                                                                                                                                                                                              |
| Lung parenchyma                                   | <ul style="list-style-type: none"> <li>• Ground-glass opacities<sup>1-4</sup></li> <li>• Interstitial infiltrates<sup>1-4</sup></li> <li>• Alveolar infiltrates<sup>1-4</sup></li> <li>• Mixed (interstitial/alveolar) infiltrates<sup>1-4</sup></li> <li>• Scattered or localized haze with or without segmental distribution</li> <li>• High attenuation infiltrates<sup>3</sup></li> <li>• Pulmonary nodules or mass-like opacities<sup>6-8</sup></li> <li>• Inter- or intralobular septal thickening<sup>3</sup></li> <li>• Reticular, reticulonodular opacities<sup>2</sup></li> <li>• Traction bronchiectases and honeycombing pattern<sup>2</sup></li> <li>• Alveolar hemorrhage<sup>9</sup></li> </ul> | Common, appreciated more often than on chest X-ray <sup>1</sup><br>Bilateral, asymmetric distribution<br><br>Common, 80-180 HU, associated with high iodine content <sup>5</sup><br>Less common, due to drug accumulation in areas of previous inflammation (peripheral location)<br><br>Suggest pulmonary fibrosis<br>Less common, suggest lung fibrosis with alveolar destruction <sup>2</sup><br>Uncommon |
| Bronchi                                           | <ul style="list-style-type: none"> <li>• Bronchial dilatations<sup>10</sup></li> <li>• Bronchial wall thickening<sup>10</sup></li> </ul>                                                                                                                                                                                                                                                                                                                                                                                                                                                                                                                                                                       | Less common<br>Less common                                                                                                                                                                                                                                                                                                                                                                                   |
| Pleura                                            | <ul style="list-style-type: none"> <li>• Pleural thickening<sup>4</sup></li> <li>• Pleural effusion<sup>3</sup></li> </ul>                                                                                                                                                                                                                                                                                                                                                                                                                                                                                                                                                                                     | Very common<br>Uncommon                                                                                                                                                                                                                                                                                                                                                                                      |

**References**

1. Kuhlman JE, Teigen C, Ren H, et al. Amiodarone pulmonary toxicity: CT findings in symptomatic patients. *Radiology* 1990;177:121-5.
2. Wolkove N, Baltzan M. Amiodarone pulmonary toxicity. *Can Respir J* 2009;16:43-8.
3. Schwaiblmair M, Berghaus T, Haeckel T, Wagner T, von Scheidt W. Amiodarone-induced pulmonary toxicity: an under-recognized and severe adverse effect? *Clin Res Cardiol* 2010;99:693-700.
4. Papiris SA, Triantafillidou C, Kolilekas L, Markoulaki D, Manali ED. Amiodarone: review of pulmonary effects and toxicity. *Drug Saf* 2010;33:539-58.
5. Maffessanti M, Dalpiaz G. Diffuse lung diseases: clinical features, pathology, HRCT. 2006:xi, 238 p.
6. Arnon R, Raz I, Chajek-Shaul T, et al. Amiodarone pulmonary toxicity presenting as a solitary lung mass. *Chest* 1988;93:425-7.
7. Piccione W, Jr., Faber LP, Rosenberg MS. Amiodarone-induced pulmonary mass. *Ann Thorac Surg* 1989;47:918-9.
8. Polverosi R, Zanellato E, Doroldi C. [Thoracic radiography and high resolution computerized tomography in the diagnosis of pulmonary disorders caused by amiodarone]. *Radiol Med* 1996;92:58-62.

9. Iskandar SB, Abi-Saleh B, Keith RL, Byrd RP, Jr., Roy TM. Amiodarone-induced alveolar hemorrhage. *South Med J* 2006;99:383-7.
10. Vernhet H, Bousquet C, Durand G, Giron J, Senac JP. Reversible amiodarone-induced lung disease: HRCT findings. *Eur Radiol* 2001;11:1697-703.
11. Rossi SE, Erasmus JJ, McAdams HP, Sporn TA, Goodman PC. Pulmonary drug toxicity: radiologic and pathologic manifestations. *Radiographics* 2000;20:1245-59.
